# Supplementary material for: Transforming the European Union's phosphorus governance through holistic and intersectoral framings
Source: Frontiers journal article supplement (doi:10.3389/fsrma.2023.1273271), 2023-11-29
Supplement: downloadfile [file 1273271]

## Sheet: Data
	Source: World Bank (2023) Commodity prices, October 2023, link: https://thedocs.worldbank.org/en/doc/5d903e848db1d1b83e0ec8f744e55570-0350012021/related/CMO-Historical-Data-Monthly.xlsx (last accessed: 25.10.2023)
	Year	Diammonium Phosphate (DAP), ($/mt)	Trisodium Phosphate (TSP), ($/mt)						Year, Month	Phosphate Rock	Diammonium Phosphate	Triple Super Phosphate
	1960	...	53						1960	13	...	53
	1961	...	52						1960M02	13	...	53
	1962	...	51						1960M03	13	...	53
	1963	...	52						1960M04	13	...	53
	1964	...	53						1960M05	13	...	53
	1965	...	54						1960M06	13	...	53
	1966	...	50						1960M07	13	...	53
	1967	68.5	45						1960M08	13	...	53
	1968	60.5	37.5						1960M09	13	...	53
	1969	58	39.25						1960M10	13	...	53
	1970	54	42.5						1960M11	13	...	53
	1971	61.75	43.25						1960M12	13	...	53
	1972	91	67.5						1961	13	...	52
	1973	118.75	99.5						1961M02	13	...	52
	1974	332.621	303.583						1961M03	13	...	52
	1975	242.5	202.5						1961M04	13	...	52
	1976	119.917	90.9167						1961M05	13	...	52
	1977	134.083	97.9167						1961M06	13	...	52
	1978	139.833	98.0417						1961M07	13	...	52
	1979	193.333	146.225						1961M08	13	...	52
	1980	222.208	180.25						1961M09	13	...	52
	1981	177.625	161.333						1961M10	13	...	52
	1982	166.625	138.417						1961M11	13	...	52
	1983	169.083	134.667						1961M12	13	...	52
	1984	175.625	131.25						1962	11.5	...	51
	1985	157.167	121.375						1962M02	11.5	...	51
	1986	138.167	121.167						1962M03	11.5	...	51
	1987	160	138						1962M04	11.5	...	51
	1988	180.167	158.375						1962M05	11.5	...	51
	1989	155.292	144						1962M06	11.5	...	51
	1990	154.675	131.821						1962M07	11.5	...	51
	1991	158.25	133.121						1962M08	11.5	...	51
	1992	137.873	120.736						1962M09	11.5	...	51
	1993	121.996	111.944						1962M10	11.5	...	51
	1994	160.424	132.105						1962M11	11.5	...	51
	1995	199.772	149.632						1962M12	11.5	...	51
	1996	198.104	175.83						1963	11.5	...	52
	1997	186.99	171.909						1963M02	11.5	...	52
	1998	186.863	173.049						1963M03	11.5	...	52
	1999	171.1	154.491						1963M04	11.5	...	52
	2000	147.669	137.708						1963M05	11.5	...	52
	2001	143.51	126.876						1963M06	11.5	...	52
	2002	152.194	133.063						1963M07	11.5	...	52
	2003	171.666	149.333						1963M08	11.5	...	52
	2004	204.744	186.312						1963M09	11.5	...	52
	2005	226.785	201.479						1963M10	11.5	...	52
	2006	229.872	201.633						1963M11	11.5	...	52
	2007	391.962	339.054						1963M12	11.5	...	52
	2008	861.619	879.381						1964	12.5	...	53
	2009	288.469	257.417						1964M02	12.5	...	53
	2010	456.427	381.89						1964M03	12.5	...	53
	2011	516.288	538.26						1964M04	12.5	...	53
	2012	480.238	462						1964M05	12.5	...	53
	2013	410.973	380.75						1964M06	12.5	...	53
	2014	429.586	382						1964M07	12.5	...	53
	2015	416.624	377.6						1964M08	12.5	...	53
	2016	315.814	290.271						1964M09	12.5	...	53
	2017	323.027	283.204						1964M10	12.5	...	53
	2018	393.425	346.736						1964M11	12.5	...	53
	2019	306.355	294.548						1964M12	12.5	...	53
	2020	312.424	265.038						1965	14	...	54
	2021	600.963	538.189						1965M02	14	...	54
	2022	772.158	716.053						1965M03	14	...	54
									1965M04	14	...	54
									1965M05	14	...	54
									1965M06	14	...	54
									1965M07	14	...	54
									1965M08	14	...	54
									1965M09	14	...	54
									1965M10	14	...	54
									1965M11	14	...	54
									1965M12	14	...	54
									1966	13	...	50
									1966M02	13	...	50
									1966M03	13	...	50
									1966M04	13	...	50
									1966M05	13	...	50
									1966M06	13	...	50
									1966M07	13	...	50
									1966M08	13	...	50
									1966M09	13	...	50
									1966M10	13	...	50
									1966M11	13	...	50
									1966M12	13	...	50
									1967	12	68.5	46.5
									1967M02	12	68.5	46.5
									1967M03	12	68.5	46.5
									1967M04	12	68.5	46.5
									1967M05	12	68.5	46.5
									1967M06	12	68.5	46.5
									1967M07	12	68.5	43.5
									1967M08	12	68.5	43.5
									1967M09	12	68.5	43.5
									1967M10	12	68.5	43.5
									1967M11	12	68.5	43.5
									1967M12	12	68.5	43.5
									1968	11.5	60.5	39
									1968M02	11.5	60.5	39
									1968M03	11.5	60.5	39
									1968M04	11.5	60.5	39
									1968M05	11.5	60.5	39
									1968M06	11.5	60.5	39
									1968M07	11.5	60.5	36
									1968M08	11.5	60.5	36
									1968M09	11.5	60.5	36
									1968M10	11.5	60.5	36
									1968M11	11.5	60.5	36
									1968M12	11.5	60.5	36
									1969	11.25	58	38.5
									1969M02	11.25	58	38.5
									1969M03	11.25	58	38.5
									1969M04	11.25	58	38.5
									1969M05	11.25	58	38.5
									1969M06	11.25	58	38.5
									1969M07	11.25	58	40
									1969M08	11.25	58	40
									1969M09	11.25	58	40
									1969M10	11.25	58	40
									1969M11	11.25	58	40
									1969M12	11.25	58	40
									1970	11	54	44
									1970M02	11	54	44
									1970M03	11	54	44
									1970M04	11	54	44
									1970M05	11	54	44
									1970M06	11	54	44
									1970M07	11	54	41
									1970M08	11	54	41
									1970M09	11	54	41
									1970M10	11	54	41
									1970M11	11	54	41
									1970M12	11	54	41
									1971	11.25	57.5	40
									1971M02	11.25	57.5	40
									1971M03	11.25	57.5	40
									1971M04	11.25	57.5	40
									1971M05	11.25	57.5	40
									1971M06	11.25	57.5	40
									1971M07	11.25	66	46.5
									1971M08	11.25	66	46.5
									1971M09	11.25	66	46.5
									1971M10	11.25	66	46.5
									1971M11	11.25	66	46.5
									1971M12	11.25	66	46.5
									1972	11.5	83	60
									1972M02	11.5	83	60
									1972M03	11.5	83	60
									1972M04	11.5	83	60
									1972M05	11.5	83	60
									1972M06	11.5	83	60
									1972M07	11.5	99	75
									1972M08	11.5	99	75
									1972M09	11.5	99	75
									1972M10	11.5	99	75
									1972M11	11.5	99	75
									1972M12	11.5	99	75
									1973	13.75	105	84
									1973M02	13.75	105	84
									1973M03	13.75	105	84
									1973M04	13.75	105	84
									1973M05	13.75	105	84
									1973M06	13.75	105	84
									1973M07	13.75	132.5	115
									1973M08	13.75	132.5	115
									1973M09	13.75	132.5	115
									1973M10	13.75	132.5	115
									1973M11	13.75	132.5	115
									1973M12	13.75	132.5	115
									1974	42	215	180
									1974M02	42	232.5	220
									1974M03	42	262.5	242
									1974M04	42	293.8	281
									1974M05	42	301.3	294
									1974M06	63	339.5	336
									1974M07	63	358.1	341
									1974M08	63	365	337
									1974M09	63	405	361
									1974M10	63	405	355
									1974M11	65	405	355
									1974M12	64.25	408.75	341
									1975	68	396	335
									1975M02	68	383	320
									1975M03	68	363	297
									1975M04	68	307	249
									1975M05	68	242	206
									1975M06	68	194	172
									1975M07	68	181	158
									1975M08	68	185	158
									1975M09	68	192	158
									1975M10	68	162	131
									1975M11	68	150	123
									1975M12	58	155	123
									1976	40	130	105
									1976M02	40	125	98
									1976M03	35	126	98
									1976M04	35	113	90
									1976M05	35	104	80
									1976M06	35	100	80
									1976M07	35	120	85
									1976M08	35	125	93
									1976M09	35	140	100
									1976M10	35	128	93
									1976M11	35	115	86
									1976M12	35	113	83
									1977	140	130	95
									1977M02	142.5	133	95
									1977M03	123.5	137	99
									1977M04	44	134	98
									1977M05	44	129	92
									1977M06	40.75	133	96
									1977M07	37.5	133	95
									1977M08	31.2	143	104
									1977M09	34.5	148	108
									1977M10	34.5	138	107
									1977M11	34.5	123	93
									1977M12	34.5	128	93
									1978	28	138	98
									1978M02	28	138	93
									1978M03	28	137	97
									1978M04	31.375	131	97
									1978M05	32.5	128	93
									1978M06	32.5	130	92
									1978M07	32.5	137	95
									1978M08	32.5	143	102
									1978M09	32.5	151.5	105.5
									1978M10	32.5	151.5	105.5
									1978M11	32.5	151.5	101
									1978M12	32.5	141.5	97.5
									1979	32.5	153	109.5
									1979M02	32.5	157.5	116.5
									1979M03	32.5	162.5	132
									1979M04	32.5	164	134.2
									1979M05	32.5	162	130.5
									1979M06	32.5	175.5	131.5
									1979M07	35.75	187.5	141.5
									1979M08	39	207.5	151.5
									1979M09	39	215	153
									1979M10	39	247.5	177.5
									1979M11	39	242	187
									1979M12	39	246	190
									1980	39	257	197.5
									1980M02	39	257.5	195
									1980M03	42	260.5	200
									1980M04	54	202.5	182.5
									1980M05	54	211	171
									1980M06	44	212.5	170
									1980M07	44	215	173
									1980M08	44	215	167.5
									1980M09	44	205	165
									1980M10	44	202.5	164.5
									1980M11	44	214	175.5
									1980M12	44	214	201.5
									1981	44	227.5	202.5
									1981M02	44	226	204.5
									1981M03	44	207.5	187.5
									1981M04	47.5	193	177.5
									1981M05	51	195.5	161
									1981M06	51	190	157.5
									1981M07	51	177.5	146.5
									1981M08	51	179.5	137.5
									1981M09	51	130	139
									1981M10	51	122.5	133.5
									1981M11	51	145	146.5
									1981M12	51	137.5	142.5
									1982	51	135	155
									1982M02	51	190	157.5
									1982M03	51	190	140
									1982M04	51	168.5	135.5
									1982M05	48.4	166	138.5
									1982M06	44.5	167	133
									1982M07	37.375	168	133.5
									1982M08	35	165.5	135.5
									1982M09	35	167	135
									1982M10	35	163.5	134
									1982M11	35	160.5	131.5
									1982M12	41.25	158.5	132
									1983	47.5	150.5	137.5
									1983M02	47.5	164	134.5
									1983M03	47.5	179.5	145
									1983M04	47.5	180.5	136
									1983M05	43	171.5	132.5
									1983M06	41.125	158.5	127.5
									1983M07	37.25	157.5	128
									1983M08	34	154.5	122.5
									1983M09	34	160	124.5
									1983M10	34	174	145
									1983M11	32.75	188.5	140.5
									1983M12	31.5	190	142.5
									1984	31.5	191.5	142.5
									1984M02	31.5	204	142.5
									1984M03	31.5	201	132.5
									1984M04	31.5	198.5	125
									1984M05	31.5	171.5	116
									1984M06	31.5	156	120
									1984M07	33.8	163.5	132.5
									1984M08	33.5	170.5	137.5
									1984M09	33.5	168	137.5
									1984M10	35	166	137.5
									1984M11	36	160.5	127.5
									1984M12	36	156.5	124
									1985	36	158.5	117.5
									1985M02	36	156	113.5
									1985M03	36	179.5	114
									1985M04	36	179.5	116
									1985M05	36	154	116
									1985M06	36	151.5	112
									1985M07	36	151	114.5
									1985M08	36	155.5	122.5
									1985M09	36	154	126
									1985M10	36	151	132.5
									1985M11	36	149	135
									1985M12	36	146.5	137
									1986	36	145.5	133
									1986M02	36	143	134.5
									1986M03	36	148	139
									1986M04	36	149	140
									1986M05	36	148	127
									1986M06	36	140.5	118.5
									1986M07	36	135.5	110.5
									1986M08	36	135.5	108
									1986M09	36	129.5	111
									1986M10	36	134.5	116
									1986M11	36	127	108
									1986M12	36	122	108.5
									1987	36	140	113.5
									1987M02	36	161	126.5
									1987M03	36	165	131
									1987M04	34.5	157.5	132.5
									1987M05	34.5	151.5	132.5
									1987M06	34.5	149	139.5
									1987M07	34.5	159.5	146.5
									1987M08	34.5	167	152.5
									1987M09	33.25	167.5	149.5
									1987M10	32	163	145.5
									1987M11	32	165	144
									1987M12	32	174	142.5
									1988	32	189	154.5
									1988M02	32	194.5	153.5
									1988M03	32	189	154
									1988M04	32	194.5	154
									1988M05	32	175.5	154
									1988M06	32	166.5	157.5
									1988M07	32	177	157.5
									1988M08	31.2	176.5	161.5
									1988M09	31	173.5	162
									1988M10	31	174.5	164
									1988M11	31	173	164
									1988M12	31	178.5	164
									1989	31	181	164
									1989M02	31	178.5	164
									1989M03	31	176.5	158
									1989M04	31	167.5	156.5
									1989M05	31	152.5	149
									1989M06	31	142.5	140.5
									1989M07	31	137.5	140.5
									1989M08	31	144	136.5
									1989M09	31	156	136.5
									1989M10	31	148	130.5
									1989M11	31	142	126
									1989M12	31	137.5	126
									1990	31	138.5	109.5
									1990M02	31	139.75	112
									1990M03	31	146	112
									1990M04	31	155.2	127.5
									1990M05	31	149.125	127.5
									1990M06	31.5	152.75	130
									1990M07	31.5	160.7	131
									1990M08	31.5	160.5	135.6
									1990M09	31.5	165.875	144.25
									1990M10	31.5	165.7	149.5
									1990M11	31.5	163.375	152.5
									1990M12	31.5	158.625	150.5
									1991	31.5	157.375	152.5
									1991M02	31.5	160.625	152.5
									1991M03	31.5	163.625	147.5
									1991M04	31.5	166	143.25
									1991M05	31.5	165.25	130.6
									1991M06	31.5	159.25	129.5
									1991M07	31.5	163.5	131
									1991M08	31.5	161.875	127
									1991M09	31.5	159.5	122.5
									1991M10	31.5	155	121.1
									1991M11	31.5	143.5	120
									1991M12	31.5	143.5	120
									1992	31.5	145.25	120
									1992M02	31.5	147.875	120
									1992M03	31.5	144.8	120
									1992M04	31.5	142.75	120.2
									1992M05	31.5	140.5	120.5
									1992M06	31.5	143.5	120.5
									1992M07	31.5	146	120.5
									1992M08	31.5	131.4	120.75
									1992M09	31.5	131.25	121.5
									1992M10	31.5	130.125	121.5
									1992M11	31.5	126.4	121.5
									1992M12	31.5	124.625	121.88
									1993	31.5	123.75	121.88
									1993M02	31.5	120.25	121.5
									1993M03	31.5	115.1	111
									1993M04	31.5	112.75	109.6
									1993M05	31.5	115.1	107.5
									1993M06	31.5	113.875	105.5
									1993M07	31.5	112.875	105.1
									1993M08	31.5	113.1	107.5
									1993M09	31.5	116.875	107.5
									1993M10	31.5	129.5	111.25
									1993M11	31.5	140.4	112.5
									1993M12	31.5	150.375	122.5
									1994	31.5	150	125
									1994M02	31.5	151.75	125.63
									1994M03	31.5	155.875	127.5
									1994M04	31.5	162.25	130
									1994M05	31.5	159.2	132.5
									1994M06	31.5	157.625	132.5
									1994M07	31.5	158.625	132.5
									1994M08	31.5	161.1	132.5
									1994M09	31.5	164	132.5
									1994M10	31.5	167.125	136.63
									1994M11	33.5	165.875	139
									1994M12	33.5	171.667	139
									1995	33.5	188.2	142.38
									1995M02	31.5	198.625	147.5
									1995M03	31.5	205.625	147.5
									1995M04	31.5	204.5	147.5
									1995M05	31.5	197.8	147.5
									1995M06	31.5	185.625	147.5
									1995M07	33.5	180.8	147.5
									1995M08	33.5	185.25	147.5
									1995M09	33.5	192	147.5
									1995M10	33.5	204.8	150
									1995M11	33.5	224.875	160.7
									1995M12	33.5	229.167	162.5
									1996	33.5	226.3	162.5
									1996M02	33.5	225.875	169.1
									1996M03	33.5	221	173.5
									1996M04	33.5	210.75	173.5
									1996M05	33.5	186.125	173.5
									1996M06	33.5	182.125	174.63
									1996M07	32.9	188	175.63
									1996M08	32.5	189.875	178.6
									1996M09	32.5	186.7	181.5
									1996M10	32.5	183.75	182.5
									1996M11	32.5	188.25	182.5
									1996M12	32.5	188.5	182.5
									1997	32.5	188	181.9
									1997M02	32.5	187.375	181
									1997M03	32.5	187.4	181
									1997M04	32.5	188.5	177.63
									1997M05	32.5	188.5	170
									1997M06	32.5	187	170
									1997M07	32.5	186.875	168.2
									1997M08	32.5	186.625	163.5
									1997M09	32.5	186.6	163.5
									1997M10	32.5	186	164.3
									1997M11	32.5	185.5	169.38
									1997M12	32.5	185.5	172.5
									1998	32.5	184	172.5
									1998M02	32.5	183.5	172.5
									1998M03	32.5	183.5	172.5
									1998M04	32.5	185	173.7
									1998M05	32.5	186.5	176.34
									1998M06	32.5	189.2	177.5
									1998M07	32.5	190.5	177.5
									1998M08	32.5	190.5	175
									1998M09	32.5	190.5	172.5
									1998M10	32.5	189.625	171.55
									1998M11	32.5	186.7	167.5
									1998M12	32.5	182.833	167.5
									1999	32.5	181.75	166.38
									1999M02	41.125	181.625	163
									1999M03	44	181.75	163
									1999M04	44	180.5	163
									1999M05	44	180.5	163
									1999M06	44	180.5	161.75
									1999M07	44	177	153.88
									1999M08	44	172.4	151.25
									1999M09	44	164.375	147.5
									1999M10	44	157	145.13
									1999M11	44	148.3	138
									1999M12	44	147.5	138
									2000	44	147.2	138
									2000M02	44	144.5	138
									2000M03	44	143	138
									2000M04	44	143	138
									2000M05	44	143	138
									2000M06	44	142	138
									2000M07	44	140.3	140.25
									2000M08	44	148.625	142.5
									2000M09	44	157.5	142.5
									2000M10	44	155.9	141.25
									2000M11	44	153.5	129
									2000M12	44	153.5	129
									2001	44	154.5	129
									2001M02	44	159	129
									2001M03	44	159.125	129
									2001M04	44	151.3	129
									2001M05	44	142	125.5
									2001M06	44	133.125	122.5
									2001M07	44	135	123.75
									2001M08	44	135	125
									2001M09	44	135	124.38
									2001M10	44	135.9	124.38
									2001M11	44	140.5	130
									2001M12	44	141.667	131
									2002	44	146	131
									2002M02	44	150.25	138
									2002M03	44	149.75	138
									2002M04	44	147.8	132
									2002M05	44	143.875	136.1
									2002M06	44	149.5	128.88
									2002M07	44	160.5	127.38
									2002M08	44	162.5	133.3
									2002M09	44	160.9	135.5
									2002M10	44	156.25	133.1
									2002M11	44	151.5	132
									2002M12	44	147.5	131.5
									2003	44	149.75	128.6
									2003M02	44	155.25	136
									2003M03	44	177.2	143.75
									2003M04	44	181.5	145
									2003M05	44	178.438	146
									2003M06	44	171.3	148.25
									2003M07	44	176.375	150.9
									2003M08	44	175.625	150
									2003M09	44	171.3	153.625
									2003M10	44	166.375	164
									2003M11	44	169.375	163
									2003M12	44	187.5	162.875
									2004	44	204.25	171.625
									2004M02	44	211.5	177.125
									2004M03	44	205.3	177.5
									2004M04	44	199.375	177.5
									2004M05	44	191.1	177.5
									2004M06	44	190.625	177.5
									2004M07	44	201.5	191.5
									2004M08	44	208.1	195
									2004M09	44	208.5	195
									2004M10	44	211.75	195
									2004M11	44	213.8	198.5
									2004M12	44	211.125	202
									2005	44	208.6	202
									2005M02	44	207.125	202
									2005M03	44	210.625	202
									2005M04	44	214.75	202
									2005M05	44	217.2	201.625
									2005M06	44	224.25	201.5
									2005M07	44	228.25	201.25
									2005M08	44	231.5	201.375
									2005M09	44	240.75	201
									2005M10	44	246.375	201
									2005M11	44	246.125	201
									2005M12	44	245.875	201
									2006	44	244.3	201
									2006M02	44	238.125	201
									2006M03	44	233.625	200.6
									2006M04	44	231.75	200.5
									2006M05	44	232.9	200.5
									2006M06	44	232.375	200.5
									2006M07	44	230.3	202
									2006M08	44	228.25	202
									2006M09	44	225.125	202
									2006M10	44	218.5	202
									2006M11	44	219.375	202
									2006M12	44	223.833	205.5
									2007	44	249.2	207.5
									2007M02	44	317.625	215
									2007M03	44	387	254.5
									2007M04	44	404.6	300
									2007M05	44	392	338.125
									2007M06	44	387.875	355
									2007M07	44	398.5	355
									2007M08	44	401.625	377.5
									2007M09	57.75	399.625	392.5
									2007M10	71.5	406	402.9
									2007M11	71.5	447	423.75
									2007M12	71.5	512.5	446.875
									2008	71.5	593.875	539.2
									2008M02	71.5	692.5	729.375
									2008M03	71.5	862.2	875.625
									2008M04	160.375	953.5	1029
									2008M05	190	997.5	1037
									2008M06	190	1004.1	1043.12
									2008M07	240	1075.75	1112.5
									2008M08	290	1065	1131.5
									2008M09	278	980	1079.25
									2008M10	450	910	965
									2008M11	450	710	606
									2008M12	450	495	405
									2009	450	308.875	350
									2009M02	450	313.75	320
									2009M03	450	317.8	295
									2009M04	315	300.625	278
									2009M05	270	267.875	245
									2009M06	198	256.1	220
									2009M07	90	263.25	224
									2009M08	90	276.4	225
									2009M09	90	280.625	225
									2009M10	90	271.625	246.5
									2009M11	90	273.2	228.5
									2009M12	90	331.5	232
									2010	90	383	296.25
									2010M02	90	413.625	300
									2010M03	90	424.5	354.375
									2010M04	90	417.5	372.5
									2010M05	90	410	352.75
									2010M06	90	392.5	346.8
									2010M07	98.75	418.125	360
									2010M08	125	459.9	380.75
									2010M09	125	506	428
									2010M10	125	557.25	455
									2010M11	125	554.1	463.75
									2010M12	125	540.625	472.5
									2011	125	547.4	475
									2011M02	140	413.625	490
									2011M03	145	424.5	494
									2011M04	145	417.5	535.625
									2011M05	147	410	547.5
									2011M06	155	575.875	549.5
									2011M07	161.875	597.625	555
									2011M08	182.5	597.4	560
									2011M09	182.5	587.875	560
									2011M10	188.75	571.4	592.5
									2011M11	195	563.5	570
									2011M12	195	488.75	530
									2012	195	451.4	435
									2012M02	190	435.5	445
									2012M03	160	442.875	441.25
									2012M04	185	478	441.25
									2012M05	195	490.5	485
									2012M06	193.125	501.625	485
									2012M07	188.5	436.875	485
									2012M08	182.5	504.5	485
									2012M09	182.5	527.375	485
									2012M10	182.5	533.5	474
									2012M11	182.5	487.875	447.5
									2012M12	182.5	472.833	435
									2013	182.5	462.25	428
									2013M02	182.5	464.5	419
									2013M03	160	467.625	415
									2013M04	111.5	461.125	409
									2013M05	157.5	421.25	410
									2013M06	125.625	424.125	410
									2013M07	115	409.625	410
									2013M08	115	400.375	360
									2013M09	97.5	374.8	344
									2013M10	84.375	370	324
									2013M11	87.5	334.375	320
									2013M12	96.875	341.625	320
									2014	97.5	403.375	333
									2014M02	97.5	450.125	367
									2014M03	106.6	486.5	384
									2014M04	111.5	409	383
									2014M05	112.625	413.562	385
									2014M06	111.4	421.375	389
									2014M07	111	440.625	390
									2014M08	111	446.5	391
									2014M09	111.375	438.1	398
									2014M10	116	418.75	398
									2014M11	119.5	408.75	385
									2014M12	119.5	418.375	381
									2015	119.5	440.25	381.5
									2015M02	121.25	444.125	382.5
									2015M03	123	428.8	383
									2015M04	114.125	409	380
									2015M05	110.5	413.562	380
									2015M06	118.9	421.375	380
									2015M07	121	431.5	380
									2015M08	121	434.625	378.8
									2015M09	124	428	379
									2015M10	123.5	423.75	380
									2015M11	123.5	383.875	366.4
									2015M12	123.5	340.625	360
									2016	122.6	327.125	334
									2016M02	114.5	326	286.25
									2016M03	114.5	338.125	291.25
									2016M04	114.125	330.5	295
									2016M05	110.5	313.5	295
									2016M06	110.5	306.625	285
									2016M07	110.5	305.2	281
									2016M08	109.75	318.062	281.25
									2016M09	109	320	287
									2016M10	109	310	285
									2016M11	103	298	285
									2016M12	97.5	296.625	277.5
									2017	96.875	308	270
									2017M02	95	326	278.75
									2017M03	97.5	325.625	288
									2017M04	95.625	313.125	285
									2017M05	92.5	309.25	275
									2017M06	92.5	310.3	275
									2017M07	92.5	313.75	275.75
									2017M08	88.75	320.75	280.5
									2017M09	85	325.9	283.2
									2017M10	80	322.375	283.5
									2017M11	80	344	295
									2017M12	80	357.25	308.75
									2018	80	360.375	320
									2018M02	82.5	370	320
									2018M03	84.7	378	324
									2018M04	88	384.75	325
									2018M05	88	384.375	326
									2018M06	86.8	391.6	335.2
									2018M07	86.88	400.75	344.25
									2018M08	87.5	409	357.6
									2018M09	87.5	421.63	376.25
									2018M10	91.25	420.75	385
									2018M11	92.5	410.2	379.2
									2018M12	99.17	389.67	368.33
									2019	102.5	382.13	355
									2019M02	102.5	357.38	343.75
									2019M03	98.5	335.03	321
									2019M04	97.5	323.75	310
									2019M05	97.5	313.4	305
									2019M06	97.5	314.88	293.75
									2019M07	80	307.5	283.75
									2019M08	78	292.9	275
									2019M09	77.5	285.75	270
									2019M10	77.5	277.38	270
									2019M11	74	248	264
									2019M12	72.5	238.16	243.33
									2020	72.5	264.9	239
									2020M02	72.5	279.38	245
									2020M03	71.88	276.22	245
									2020M04	70.75	282	245
									2020M05	72.9	263	243
									2020M06	75	273	240
									2020M07	75	305.1	262.2
									2020M08	76.88	341.88	276.25
									2020M09	79.38	358.38	282.5
									2020M10	80	357.1	290
									2020M11	82.5	359.63	292.5
									2020M12	83.33	388.5	320
									2021	85	421.3	337.6
									2021M02	88.13	528.88	453.75
									2021M03	96.25	534.13	458
									2021M04	95	543.4	478
									2021M05	102.5	574.63	527.5
									2021M06	125	604.75	550
									2021M07	125	613	555
									2021M08	136.88	603.13	555
									2021M09	147.5	643.75	573.75
									2021M10	147.5	672.9	618
									2021M11	153.13	726.69	665
									2021M12	176.67	745	686.67
									2022	173.13	699.38	674.38
									2022M02	172.5	747.13	680
									2022M03	178.75	938.13	792.5
									2022M04	249.5	954	856
									2022M05	255	842.5	827.5
									2022M06	287.5	783.75	730.13
									2022M07	320	784	736
									2022M08	320	749.38	703.75
									2022M09	320	752	708
									2022M10	317.5	725	675
									2022M11	300	665.63	625
									2022M12	300	625	584.38
									2023	300	631	569.38
									2023M02	322.5	612.5	547.5
									2023M03	345	606	537.5
									2023M04	345	637	550
									2023M05	345	510	485.63
									2023M06	344.5	454.55	390
									2023M07	342.5	458.75	392.25
									2023M08	346.25	528.75	450.63
									2023M09	347.5	527.9	461.5
